# Supplementary material for: Mesenchymal-Stem-Cell-Derived Extracellular Vesicles Attenuate Brain Injury in Escherichia coli Meningitis in Newborn Rats
Source: MDPI journal article supplement (doi:10.3390/life12071030), 2022-07-11
Supplement: s1 [file s1]

## Supplementary Materials

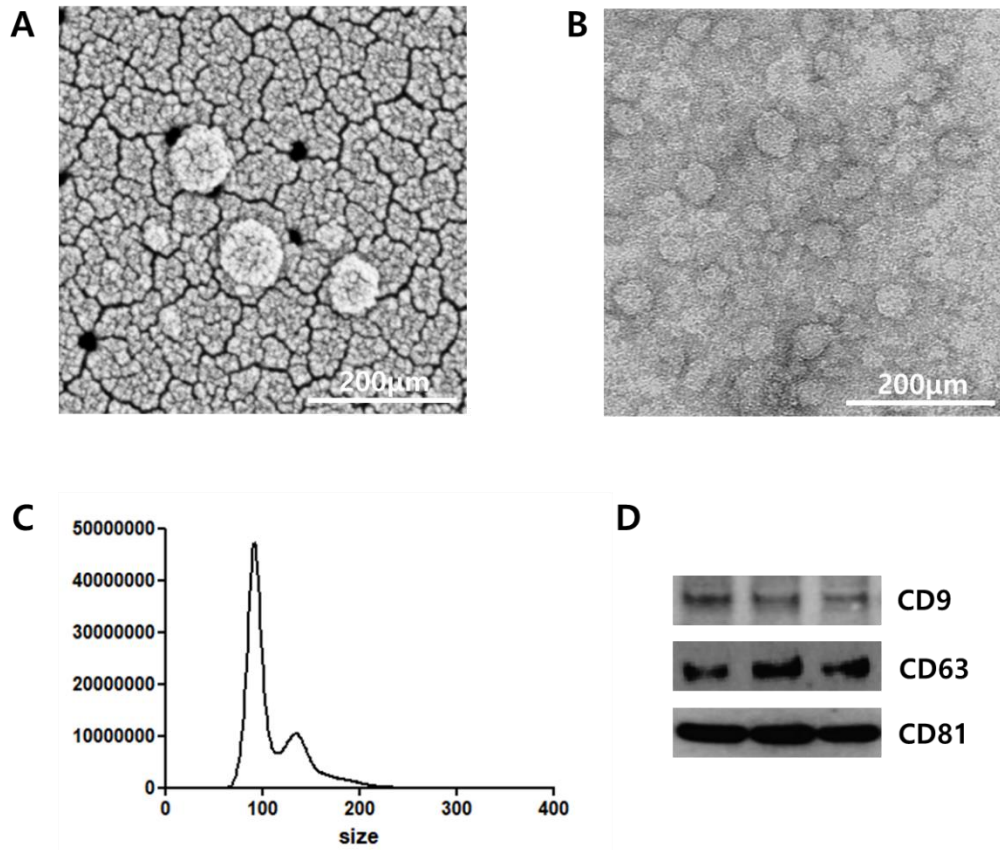

**Supplementary Figure S1.** Characterization of extracellular vesicles (EVs). (A) Scanning electron microscopic image of EVs loaded on a polycarbonate membrane. EVs were isolated from conditioned media of cultures of human Wharton's jelly-derived mesenchymal stem cells using ultra-centrifugation. (B) Transmission electron microscope photograph of EVs. (C) Particle size distribution of EVs using Nanoparticle Tracking Analysis software. The Y-axis represents the number of EVs and the X-axis represents the size of EVs. (D) Western blots for three consecutively separated EVs, indicating exosome marker proteins of CD63, CD9, and CD81, respectively.

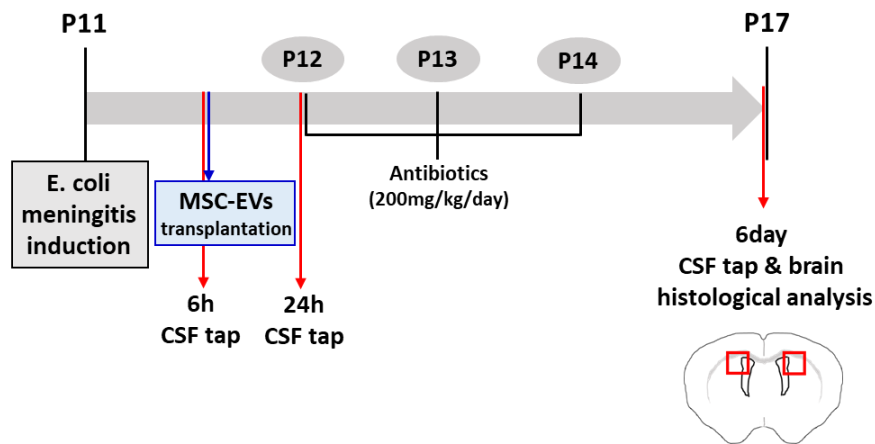

**Supplementary Figure S2.** Experimental protocol. All injections were performed directly into the lateral ventricle.  $5 \times 10^2$  CFU of *E. coli* were inoculated into the left ventricle of P11 rat pups, and MSC-EVs isolated from  $1 \times 10^5$  MSC were transplanted into the right ventricle 24 hours later. CSF was tapped three times; immediately before 1) transplantation of MSC-EVs at 6 h, 2) first administration of antibiotics at 24 h, and 3) sacrifice at 6 days after animal modeling. Histological analyses of the brain tissues were performed in the periventricular area marked with red squares. P; postnatal day, CSF; cerebrospinal fluid, MSC-EVs; EVs isolated from mesenchymal stem cells

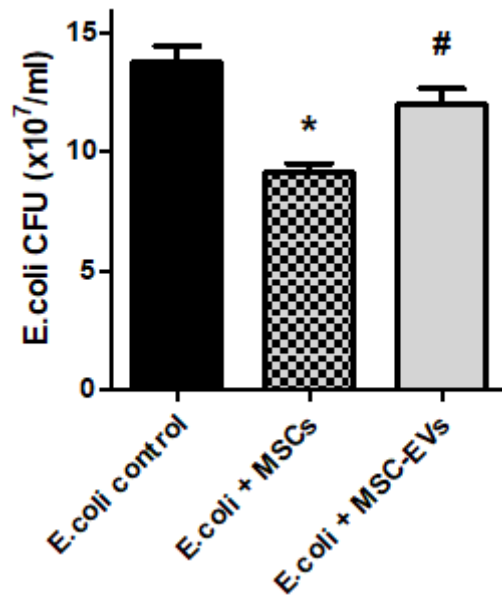

**Supplementary Figure S3.** Treatment of MSCs ( $1 \times 10^5/\text{ml}$ ), but not MSC-EVs ( $10 \mu\text{g}/\text{ml}$ ), significantly inhibited bacterial growth in culture media. Data are expressed as mean  $\pm$  SEM. \*  $p < 0.05$  vs. *E. coli* control, #  $p < 0.05$  vs. *E. coli* cultured with MSCs
